# Supplementary material for: The enzymatic activity of inositol hexakisphosphate kinase controls circulating phosphate in mammals
Source: PubMed Central journal article supplement (PMC8358040; doi:10.1038/s41467-021-24934-8), 2021-08-11
Supplement: 41467_2021_24934_MOESM1_ESM.pdf [file 41467_2021_24934_MOESM1_ESM.pdf]

Supplementary information

**The enzymatic activity of inositol hexakisphosphate kinase controls  
circulating phosphate in mammals**

Yusuke Moritoh<sup>1\*</sup>, Shin-ichi Abe<sup>1</sup>, Hiroki Akiyama<sup>1</sup>, Akihiro Kobayashi<sup>1</sup>, Ryokichi Koyama<sup>1</sup>,  
Ryoma Hara<sup>1</sup>, Shizuo Kasai<sup>1</sup>, Masanori Watanabe<sup>1</sup>

<sup>1</sup>Research Division, SCOHIA PHARMA Inc., Kanagawa, Japan

\*Correspondence to: [yusuke.moritoh@scohia.com](mailto:yusuke.moritoh@scohia.com)

### <sup>1</sup>H NMR

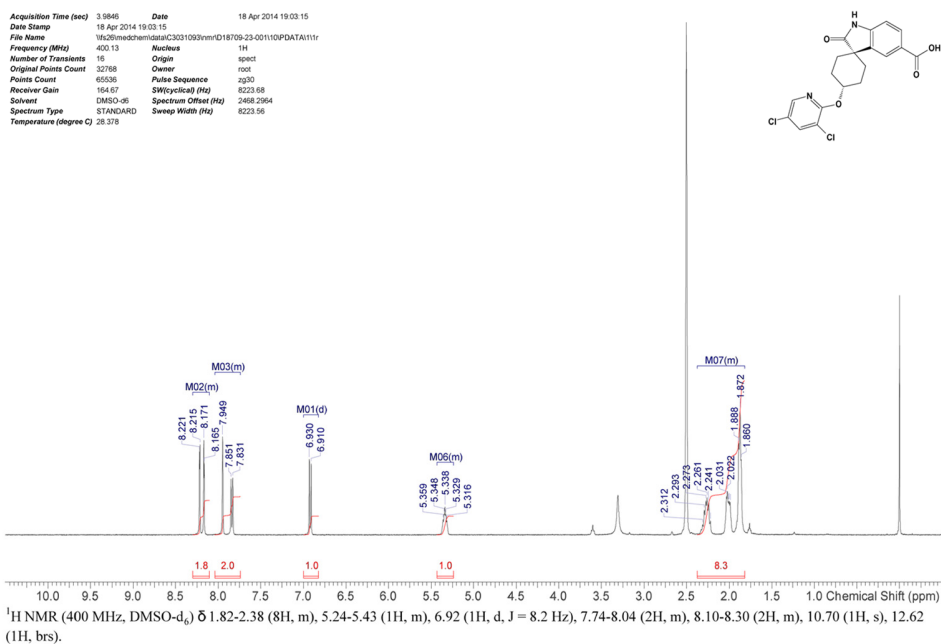

### <sup>13</sup>C NMR

|                        |                                                                               |                          |                                    |                           |                                  |
|------------------------|-------------------------------------------------------------------------------|--------------------------|------------------------------------|---------------------------|----------------------------------|
| Number of Nuclei       | 17 C's / 19 C's (spectrum / structure)                                        | Multiplets Integrals Sum | 0.00                               | Low Signal to Noise Ratio | True                             |
| Formula                | C <sub>19</sub> H <sub>16</sub> N <sub>2</sub> O <sub>4</sub> Cl <sub>2</sub> | FW                       | 407.2473                           | MF (Multi Spec)           | 0.92                             |
| Acquisition Time (sec) | 1.8088                                                                        | Comment                  | HK7868-001r                        | D                         | 0.03                             |
| DI                     | 6.5                                                                           | DS                       | 4                                  | Date                      | 04 Mar 2021 08:22:36 (GMT+09:00) |
| ExpNo                  | 10                                                                            | File Name                | E:\data\HK7868-001r\10109\data111r | Frequency (MHz)           | 75.4678                          |
| INSTRUM                | <spect>                                                                       | LB                       | 1                                  | NS                        | 8192                             |
| Origin                 | spect                                                                         | Original Points Count    | 32768                              | Owner                     | nmrsu                            |
| PROBHD                 | <2104275.0205 (PA BBO-300S1 BBF-H-05.21)>                                     | PULPROG                  | <zgpg30>                           | Points Count              | 32768                            |
| Receiver Gain          | 196.79                                                                        | SF                       | 75.467830231318                    | SFO1                      | 75.475295301                     |
| SI                     | 32768                                                                         | SSB                      | 0                                  | SW (cyclical) (Hz)        | 18115.94                         |
| Solvent                | DMSO-d <sub>6</sub>                                                           | Spectrum Offset (Hz)     | 7503.0684                          | Spectrum Type             | standard                         |
| TD                     | 1                                                                             | TE                       | 298.0964                           | Temperature (degree C)    | 23.096                           |
|                        |                                                                               |                          |                                    | Sweep Width (Hz)          | 18115.39                         |
|                        |                                                                               |                          |                                    | WDW                       | 1                                |
| User Notes             | HK7868-001r                                                                   |                          |                                    |                           |                                  |

<sup>13</sup>C NMR (75 MHz, DMSO-d<sub>6</sub>) δ ppm 25.35 (s, 1 C) 29.87 (s, 1 C) 45.11 (s, 1 C) 73.44 (s, 1 C) 108.84 (s, 1 C) 117.98 (s, 1 C) 122.69 (s, 1 C) 123.76 (s, 1 C) 124.01 (s, 1 C) 130.11 (s, 1 C) 134.76 (s, 1 C) 138.35 (s, 1 C) 143.18 (s, 1 C) 145.32 (s, 1 C) 156.77 (s, 1 C) 167.20 (s, 1 C) 181.26 (s, 1 C)

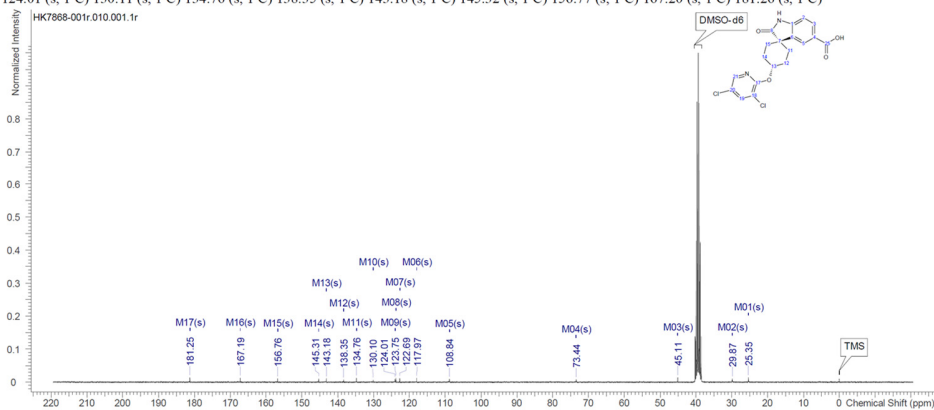

Elemental analysis, Anal. Calcd. for C<sub>19</sub>H<sub>16</sub>N<sub>2</sub>O<sub>4</sub>Cl<sub>2</sub>: C, 56.04; H, 3.96; N, 6.88. Found: C, 55.67; H, 4.12; N, 7.10.

HRMS, (ESI) *m/z* (M+H)<sup>+</sup>: Calcd. for C<sub>19</sub>H<sub>17</sub>Cl<sub>2</sub>N<sub>2</sub>O<sub>4</sub>: 407.0560, Found: 407.0560.

## Supplementary Fig. 1. Spectrum data (<sup>1</sup>H NMR and <sup>13</sup>C NMR), elemental analysis, and HRMS of SC-919.

**Supplementary Table 1. Results of the kinome assay for SC-919.**

| DiscoverX Gene Symbol       | Entrez Gene Symbol | Percent Control | SC-919 Concentration (nM) |
|-----------------------------|--------------------|-----------------|---------------------------|
| ABL1 (E255K)-phosphorylated | ABL1               | 84              | 1,000                     |
| ABL1 (T315I)-phosphorylated | ABL1               | 100             | 1,000                     |
| ABL1-nonphosphorylated      | ABL1               | 44              | 1,000                     |
| ABL1-phosphorylated         | ABL1               | 73              | 1,000                     |
| ACVR1B                      | ACVR1B             | 100             | 1,000                     |
| ADCK3                       | CABC1              | 78              | 1,000                     |
| AKT1                        | AKT1               | 90              | 1,000                     |
| AKT2                        | AKT2               | 100             | 1,000                     |
| ALK                         | ALK                | 100             | 1,000                     |
| AURKA                       | AURKA              | 100             | 1,000                     |
| AURKB                       | AURKB              | 100             | 1,000                     |
| AXL                         | AXL                | 99              | 1,000                     |
| BMPR2                       | BMPR2              | 100             | 1,000                     |
| BRAF                        | BRAF               | 98              | 1,000                     |
| BRAF (V600E)                | BRAF               | 98              | 1,000                     |
| BTK                         | BTK                | 100             | 1,000                     |
| CDK11                       | CDK19              | 100             | 1,000                     |
| CDK2                        | CDK2               | 100             | 1,000                     |
| CDK3                        | CDK3               | 97              | 1,000                     |
| CDK7                        | CDK7               | 100             | 1,000                     |
| CDK9                        | CDK9               | 100             | 1,000                     |
| CHEK1                       | CHEK1              | 100             | 1,000                     |
| CSF1R                       | CSF1R              | 99              | 1,000                     |
| CSNK1D                      | CSNK1D             | 95              | 1,000                     |
| CSNK1G2                     | CSNK1G2            | 100             | 1,000                     |
| DCAMKL1                     | DCLK1              | 95              | 1,000                     |
| DYRK1B                      | DYRK1B             | 53              | 1,000                     |
| EGFR                        | EGFR               | 100             | 1,000                     |
| EGFR (L858R)                | EGFR               | 100             | 1,000                     |
| EPHA2                       | EPHA2              | 82              | 1,000                     |
| ERBB2                       | ERBB2              | 58              | 1,000                     |
| ERBB4                       | ERBB4              | 100             | 1,000                     |
| ERK1                        | MAPK3              | 100             | 1,000                     |
| FAK                         | PTK2               | 100             | 1,000                     |
| FGFR2                       | FGFR2              | 85              | 1,000                     |
| FGFR3                       | FGFR3              | 87              | 1,000                     |
| FLT3                        | FLT3               | 99              | 1,000                     |
| GSK3B                       | GSK3B              | 98              | 1,000                     |
| IGF1R                       | IGF1R              | 100             | 1,000                     |

|                             |          |     |       |
|-----------------------------|----------|-----|-------|
| IKK-alpha                   | CHUK     | 100 | 1,000 |
| IKK-beta                    | IKBKB    | 100 | 1,000 |
| INSR                        | INSR     | 82  | 1,000 |
| JAK2 (JH1 domain-catalytic) | JAK2     | 100 | 1,000 |
| JAK3 (JH1 domain-catalytic) | JAK3     | 78  | 1,000 |
| JNK1                        | MAPK8    | 87  | 1,000 |
| JNK2                        | MAPK9    | 100 | 1,000 |
| JNK3                        | MAPK10   | 100 | 1,000 |
| KIT                         | KIT      | 64  | 1,000 |
| KIT (D816V)                 | KIT      | 94  | 1,000 |
| KIT (V559D, T670I)          | KIT      | 100 | 1,000 |
| LKB1                        | STK11    | 100 | 1,000 |
| MAP3K4                      | MAP3K4   | 90  | 1,000 |
| MAPKAPK2                    | MAPKAPK2 | 100 | 1,000 |
| MARK3                       | MARK3    | 100 | 1,000 |
| MEK1                        | MAP2K1   | 97  | 1,000 |
| MEK2                        | MAP2K2   | 87  | 1,000 |
| MET                         | MET      | 91  | 1,000 |
| MKNK1                       | MKNK1    | 93  | 1,000 |
| MKNK2                       | MKNK2    | 100 | 1,000 |
| MLK1                        | MAP3K9   | 100 | 1,000 |
| p38-alpha                   | MAPK14   | 100 | 1,000 |
| p38-beta                    | MAPK11   | 95  | 1,000 |
| PAK1                        | PAK1     | 100 | 1,000 |
| PAK2                        | PAK2     | 100 | 1,000 |
| PAK4                        | PAK4     | 100 | 1,000 |
| PCK1                        | CDK16    | 100 | 1,000 |
| PDGFRA                      | PDGFRA   | 96  | 1,000 |
| PDGFRB                      | PDGFRB   | 62  | 1,000 |
| PDPK1                       | PDPK1    | 95  | 1,000 |
| PIK3C2B                     | PIK3C2B  | 96  | 1,000 |
| PIK3CA                      | PIK3CA   | 96  | 1,000 |
| PIK3CG                      | PIK3CG   | 78  | 1,000 |
| PIM1                        | PIM1     | 100 | 1,000 |
| PIM2                        | PIM2     | 100 | 1,000 |
| PIM3                        | PIM3     | 100 | 1,000 |
| PKAC-alpha                  | PRKACA   | 100 | 1,000 |
| PLK1                        | PLK1     | 95  | 1,000 |
| PLK3                        | PLK3     | 99  | 1,000 |
| PLK4                        | PLK4     | 100 | 1,000 |
| PRKCE                       | PRKCE    | 100 | 1,000 |
| RAF1                        | RAF1     | 90  | 1,000 |
| RET                         | RET      | 99  | 1,000 |

|                             |         |     |       |
|-----------------------------|---------|-----|-------|
| RIOK2                       | RIOK2   | 100 | 1,000 |
| ROCK2                       | ROCK2   | 100 | 1,000 |
| RSK2 (Kin.Dom.1-N-terminal) | RPS6KA3 | 62  | 1,000 |
| SNARK                       | NUAK2   | 100 | 1,000 |
| SRC                         | SRC     | 100 | 1,000 |
| SRPK3                       | SRPK3   | 94  | 1,000 |
| TGFBR1                      | TGFBR1  | 94  | 1,000 |
| TIE2                        | TEK     | 97  | 1,000 |
| TRKA                        | NTRK1   | 100 | 1,000 |
| TSSK1B                      | TSSK1B  | 98  | 1,000 |
| TYK2 (JH1 domain-catalytic) | TYK2    | 74  | 1,000 |
| ULK2                        | ULK2    | 100 | 1,000 |
| VEGFR2                      | KDR     | 84  | 1,000 |
| YANK3                       | STK32C  | 96  | 1,000 |
| ZAP70                       | ZAP70   | 100 | 1,000 |

Percent Control: The compound was screened at the indicated concentration, and results for primary screen binding interactions are reported as % Control. The % Control calculation was performed as: (test compound signal – positive control signal)/(negative control signal – positive control signal) × 100. Test compound = SC-919, negative control = DMSO (100 % Control), positive control = control compound (0 % Control).

a InsP<sub>6</sub>-d<sub>6</sub>: <sup>31</sup>P NMR spectrum (162 MHz, D<sub>2</sub>O, 25 °C)

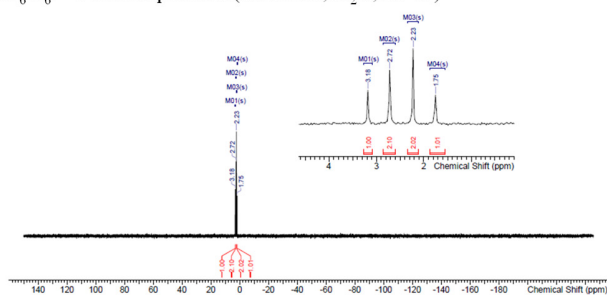

ID2876-001  
<sup>31</sup>P NMR (162 MHz, D<sub>2</sub>O, 298 K) δ 1.75 (1P, s), 2.23 (2P, s), 2.72 (2P, s), 3.18 (1P, s).

InsP<sub>7</sub>: <sup>1</sup>H NMR spectrum (500 MHz, D<sub>2</sub>O, 25 °C)

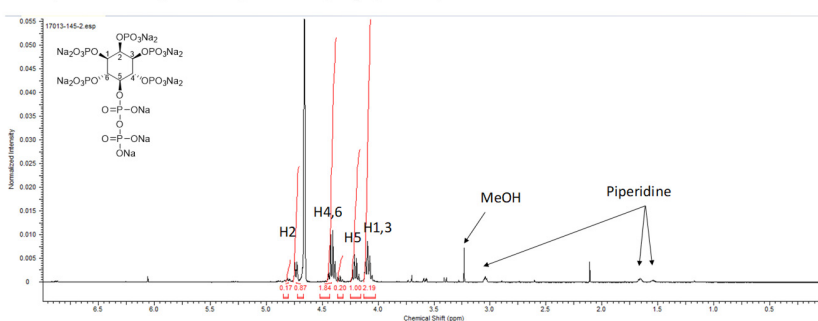

InsP<sub>7</sub>: ESI-MS *m/z* 368.92 [M-2H]<sup>2-</sup> (SCIEX TripleTOF™6600, MeOH/H<sub>2</sub>O, Negative ion mode)

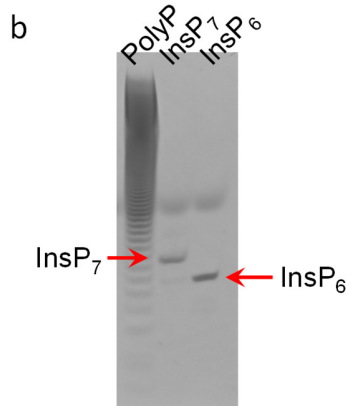

**Supplementary Fig. 2. Analytical data of InsP<sub>6</sub>-d<sub>6</sub>, and InsP<sub>7</sub> (5-InsP<sub>7</sub>), and toluidine blue staining of InsP<sub>7</sub> and InsP<sub>6</sub> following Poly-Acrylamide Gel Electrophoresis (33.3%).**

<sup>31</sup>P NMR spectra (85% H<sub>3</sub>PO<sub>4</sub> in D<sub>2</sub>O standard) of InsP<sub>6</sub>-d<sub>6</sub> and <sup>1</sup>H NMR spectra and ESI-MS data of InsP<sub>7</sub> (a). Electrophoresis of InsP<sub>7</sub>, InsP<sub>6</sub> and PolyP (106529, Supelco; PolyP ladder was used as the electrophoresis standard to maintain the quality of separation) were performed Poly-Acrylamide Gel Electrophoresis (33.3%) and each compound was stained with toluidine blue (b).

**Supplementary Table 2. Linear regression parameters using the weighting factor  $1/x^2$  for the calibration curves of InsP<sub>6</sub> and InsP<sub>7</sub> in plasma.**

| Analyte           | Calibration Curve         | r      | Linear range (ng/mL) <sup>1</sup> | Accuracy (%) |
|-------------------|---------------------------|--------|-----------------------------------|--------------|
| InsP <sub>6</sub> | $y = 1.24x + 0.0564$      | 0.9994 | 40 – 40,000                       | 95.8 – 104.9 |
| InsP <sub>7</sub> | $y = 0.00159x - 0.000117$ | 0.9995 | 0.2 - 200                         | 96.3 – 104.1 |

<sup>1</sup>calculated as sodium salt.

**Supplementary Table 3. Accuracy and precision of InsP<sub>6</sub> in quality control samples (n=3).**

| Matrix     | QC  | Concentration (ng/mL) <sup>1</sup> | Accuracy (%) <sup>2</sup> | Precision (%) <sup>3</sup> |
|------------|-----|------------------------------------|---------------------------|----------------------------|
| Liver      | LQC | 6,000                              | 98.4                      | 1.6                        |
|            | MQC | 20,000                             | 93.5                      | 2.2                        |
|            | HQC | 32,000                             | 91.1                      | 2.5                        |
| Muscle     | LQC | 1,000                              | 101.2                     | 0.6                        |
|            | MQC | 10,000                             | 97.7                      | 3.5                        |
|            | HQC | 20,000                             | 98.2                      | 0.9                        |
| Kidney     | LQC | 6,000                              | 97.6                      | 3.3                        |
|            | MQC | 20,000                             | 93.3                      | 2.2                        |
|            | HQC | 32,000                             | 90.9                      | 1.7                        |
| 293 cells  | LQC | 400                                | 99.7                      | 0.3                        |
|            | MQC | 4,000                              | 101.2                     | 1.1                        |
|            | HQC | 10,000                             | 97.3                      | 1.7                        |
| HAP1 cells | LQC | 1,000                              | 96.9                      | 2.6                        |
|            | MQC | 10,000                             | 94.9                      | 3.5                        |
|            | HQC | 20,000                             | 96.4                      | 1.9                        |

<sup>1</sup>calculated as sodium salt.

<sup>2</sup>calculated as (mean determined amount / nominal amount × 100).

<sup>3</sup>calculated as % CV (SD / mean) × 100.

**Supplementary Table 4. Accuracy and precision of InsP<sub>7</sub> in quality control samples (n = 3).**

| Matrix     | QC   | Concentration<br>(ng/mL) <sup>1</sup> | Accuracy (%) <sup>2</sup> | Precision (%) <sup>3</sup> |
|------------|------|---------------------------------------|---------------------------|----------------------------|
| Liver      | LQC  | 0.6                                   | 100.1                     | 2.4                        |
|            | MQC  | 10                                    | 97.4                      | 1.8                        |
|            | HQC  | 160                                   | 83.2                      | 0.8                        |
| Muscle     | LQC  | 0.2                                   | 99.1                      | 1.9                        |
|            | MQC  | 4                                     | 95.5                      | 0.7                        |
|            | HQC  | 20                                    | 99.1                      | 2.7                        |
| Kidney     | LQC  | 6                                     | 96.0                      | 2.5                        |
|            | MQC  | 40                                    | 90.8                      | 2.2                        |
|            | HQC  | 160                                   | 90.9                      | 2.6                        |
|            | DIQC | 400                                   | 104.3                     | 1.8                        |
| 293 cells  | LQC  | 0.6                                   | 101.4                     | 3.8                        |
|            | MQC  | 4                                     | 104.9                     | 1.8                        |
|            | HQC  | 40                                    | 101.5                     | 1.4                        |
| HAP1 cells | LQC  | 0.4                                   | 118.0                     | 9.3                        |
|            | MQC  | 2                                     | 111.0                     | 1.8                        |
|            | HQC  | 20                                    | 106.0                     | 3.8                        |

<sup>1</sup>calculated as sodium salt.

<sup>2</sup>calculated as (mean determined amount / nominal amount × 100).

<sup>3</sup>calculated as % CV (SD / mean) × 100.



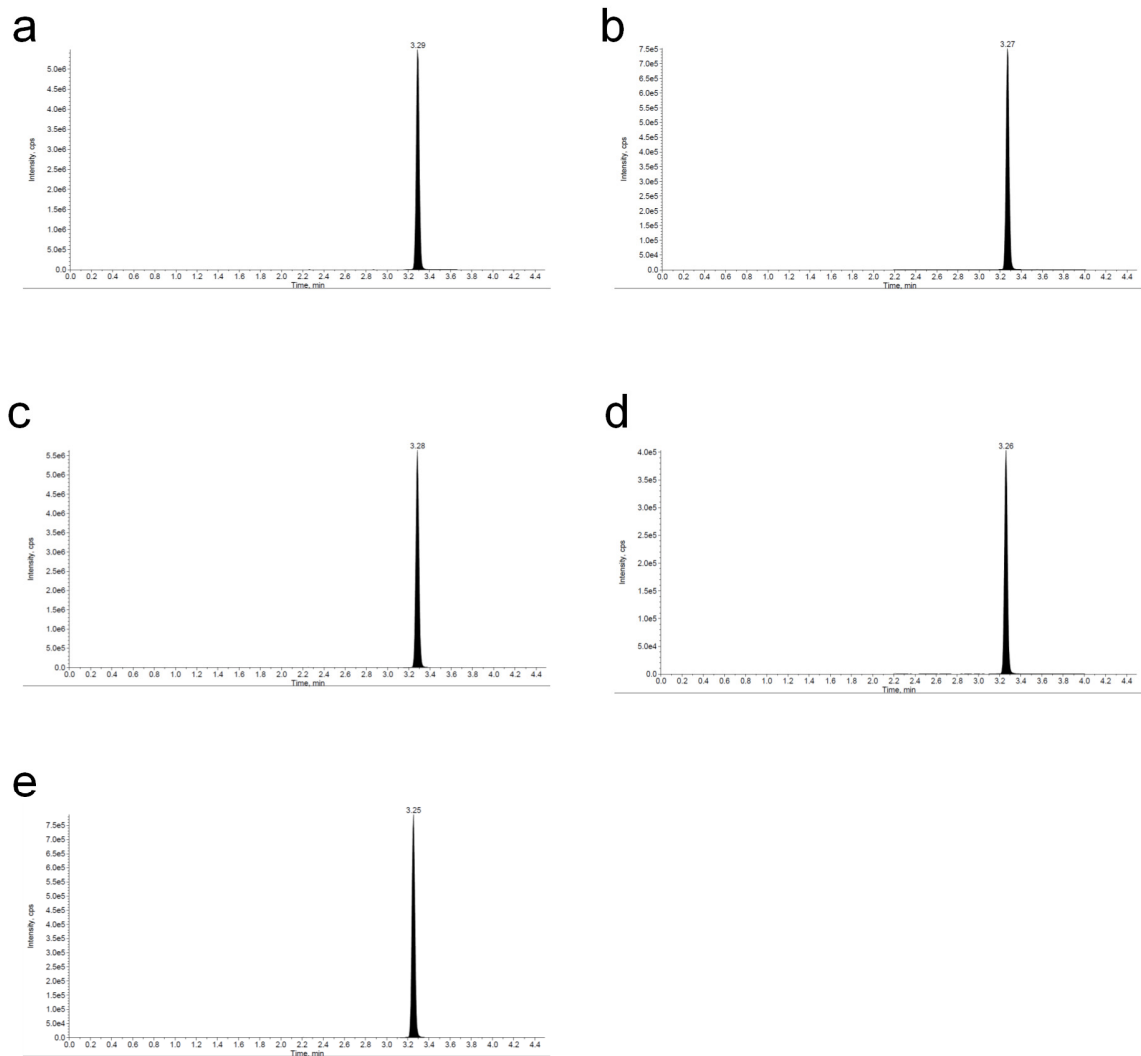

**Supplementary Fig. 3. Representative chromatograms at LQC of InsP<sub>6</sub> in a) liver, b) muscle, c) kidney, d) 293 cells, and e) HAP1 cells.**

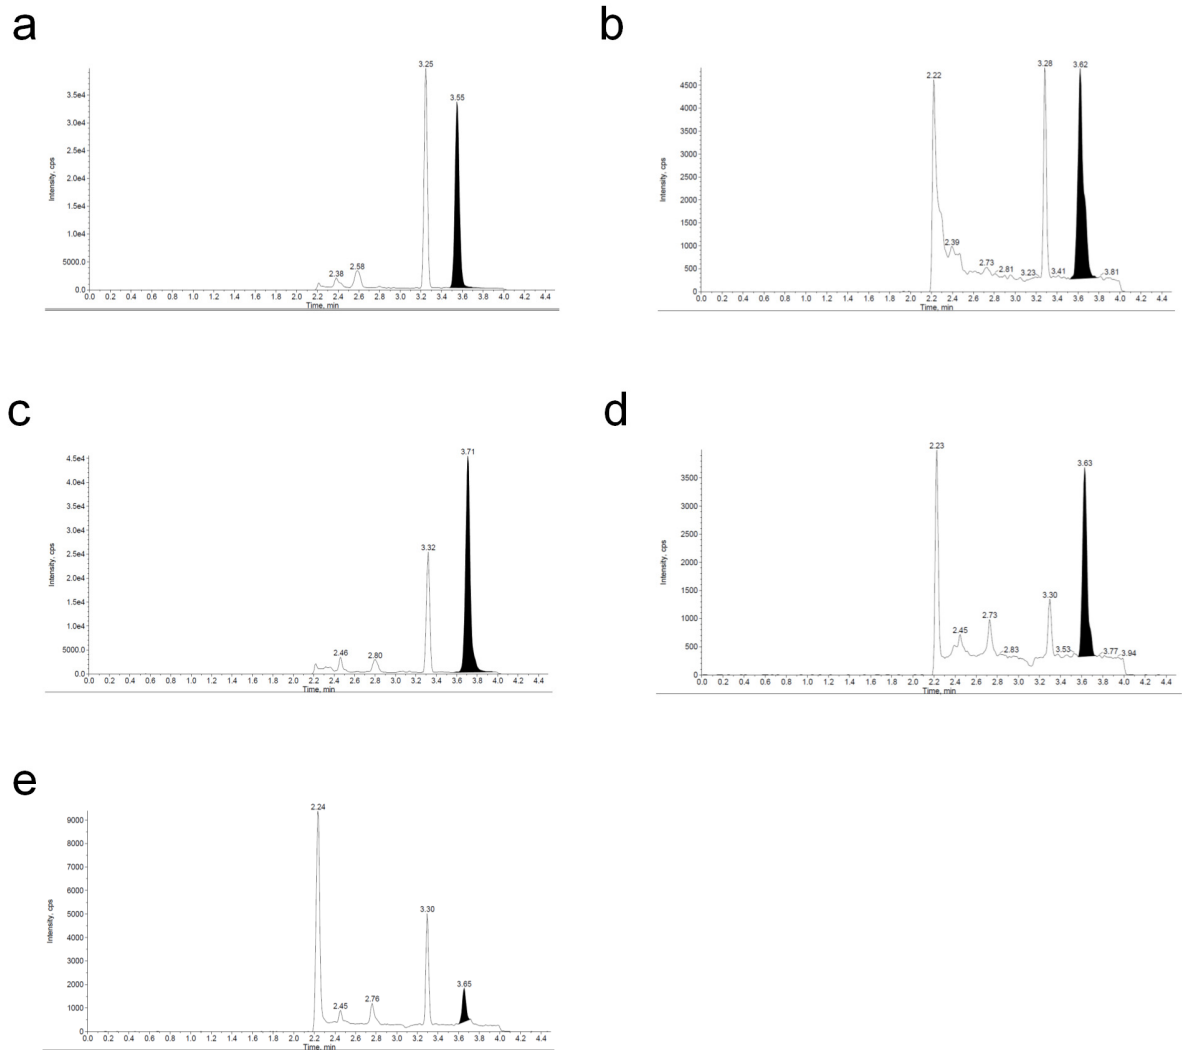

**Supplementary Fig. 4. Representative chromatograms at LQC of InsP<sub>7</sub> in a) liver, b) muscle, c) kidney, d) 293 cells, and e) HAP1 cells.**

**Supplementary Table 5. Tissue concentration of SC-919.**

| Dose level      | Tissue concentration of SC-919 (ng/g tissue) |            |            |
|-----------------|----------------------------------------------|------------|------------|
|                 | Liver                                        | Muscle     | Kidney     |
| SC-919 1 mg/kg  | 362 ± 53                                     | 128 ± 36   | 668 ± 135  |
| SC-919 10 mg/kg | 1979 ± 87                                    | 1051 ± 226 | 3152 ± 347 |

SC-919 was administered to 8-week-old SD rats, and each tissue sample was collected 2 h post dosing with SC-919. Values indicate mean ± S.D. (n = 6 biological replicates)

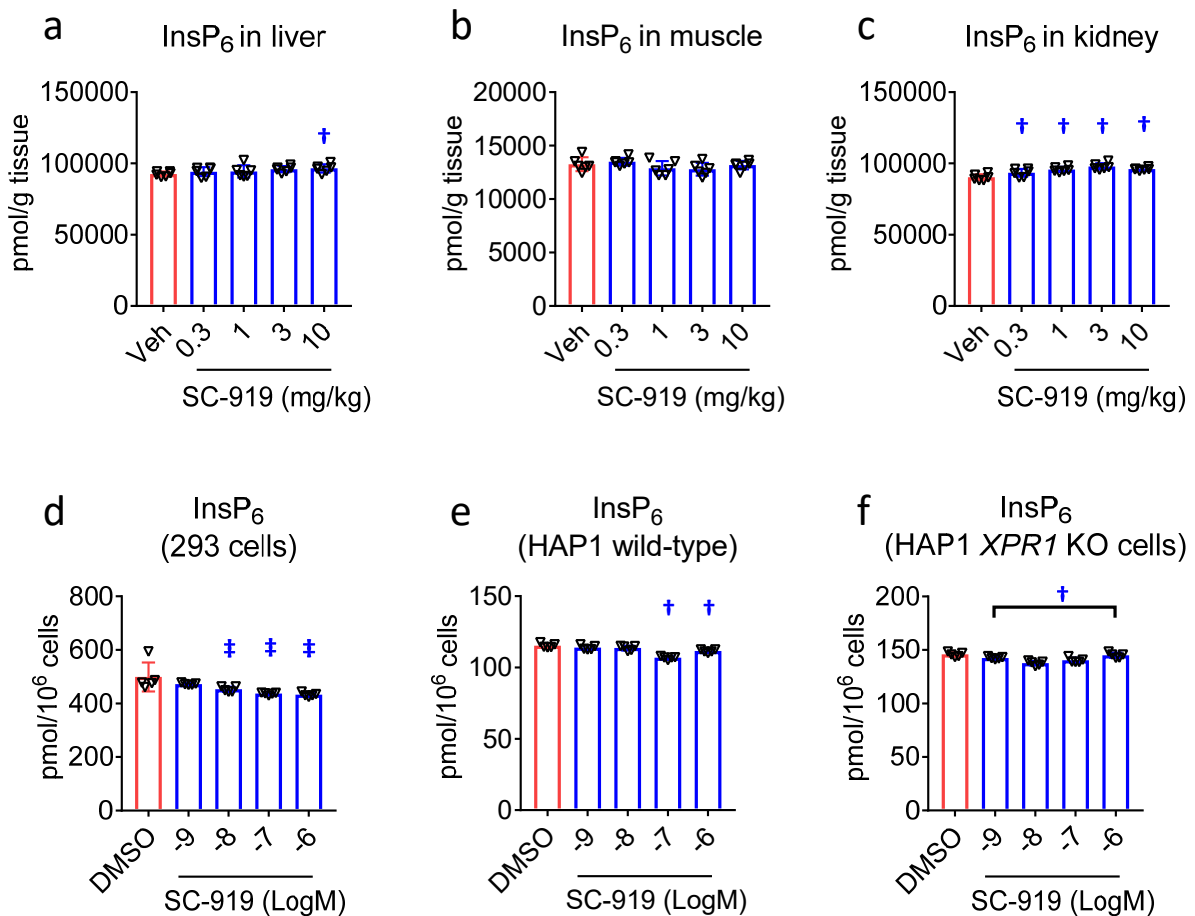

**Supplementary Fig. 5. InsP<sub>6</sub> levels in tissues and cells.** (a, b, c) InsP<sub>6</sub> levels in the liver, skeletal muscles, and kidney 2 h after the administration of SC-919 to SD rats (n = 6 biological replicates). (d, e, f) InsP<sub>6</sub> levels in 293, HAP1 wild-type, and HAP1 XPR1 KO cells treated with SC-919 for 4 h (n = 5 biological replicates). Values indicate mean ± S.D. †P < 0.05 and ‡P < 0.05 vs. vehicle or DMSO as determined using Williams' test and Shirley-Williams test, respectively. Veh, vehicle.

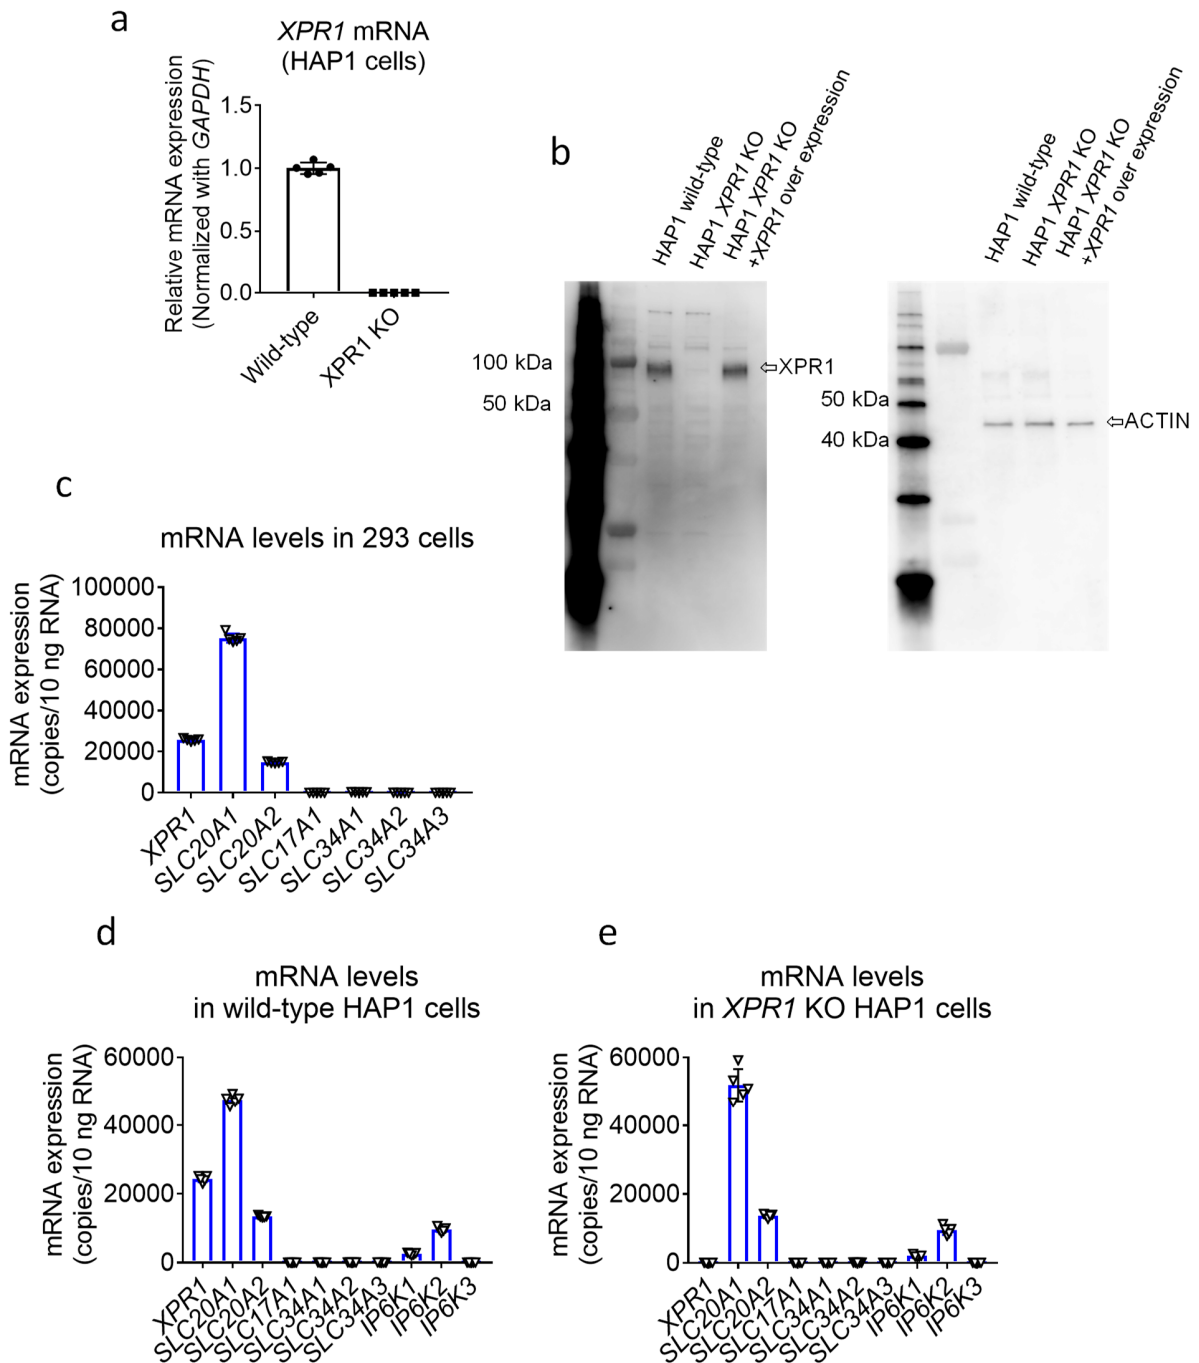

**Supplementary Fig. 6. Gene and protein expression profiles in cells.** (a) Levels of *XPR1* mRNA in HAP1 wild-type and *XPR1* KO cells. (b) Levels of XPR1 protein in HAP1 wild-type and *XPR1* KO cells. (c, d, e) transcript levels of the indicated genes in 293, HAP1 wild-type, and *XPR1* KO cells. Values indicate mean  $\pm$  S.D. (n = 5 biological replicates).

**Supplementary Table 6. Protein levels in cells treated with SC-919.**

| Group           | 293      | HAP1 wild-type | HAP1 <i>XPR1</i> KO |
|-----------------|----------|----------------|---------------------|
| DMSO            | 151 ± 24 | 137 ± 54       | 130 ± 41            |
| SC-919 0.001 μM | 154 ± 34 | 131 ± 34       | 131 ± 43            |
| SC-919 0.01 μM  | 140 ± 37 | 135 ± 43       | 126 ± 38            |
| SC-919 0.1 μM   | 136 ± 48 | 128 ± 41       | 132 ± 33            |
| SC-919 1 μM     | 141 ± 52 | 115 ± 20       | 136 ± 26            |

Values indicate mean ± S.D. (μg/mL/well, n = 6 biological replicates).

**Supplementary Table 7. MRM parameters of InsP<sub>6</sub>, InsP<sub>7</sub> and InsP<sub>6</sub>-d<sub>6</sub>.**

| Analyte                           | Precursor ion ( <i>m/z</i> ) | Product ion ( <i>m/z</i> ) | DP (V) | EP (V) | CE (V) | CXP (V) |
|-----------------------------------|------------------------------|----------------------------|--------|--------|--------|---------|
| InsP <sub>6</sub>                 | 658.8                        | 560.8                      | -80    | -10    | -37.6  | -25     |
| InsP <sub>7</sub>                 | 738.8                        | 640.8                      | -80    | -10    | -37.3  | -25     |
| InsP <sub>6</sub> -d <sub>6</sub> | 664.7                        | 566.8                      | -80    | -10    | -37.6  | -25     |

DP, declustering potential; EP, entrance potential; CE, collision energy; CXP, collision cell exit potential.

**Supplementary Table 8. Primers, probes, and standard oligonucleotide sequences used in the probe-based qPCR (Results are shown in Supplementary Fig. 6).**

| Sequence Name | Sequence (5'→3')               |
|---------------|--------------------------------|
| Hs_SLC20A1-P  | TTAGGCAACTGCCTGCACCATTACGG     |
| Hs_SLC20A1-F  | CAGCGTGGACTTGAAAGAGGAA         |
| Hs_SLC20A1-R  | GACGGCTTGACTGAACTGGAC          |
| Hs_SLC20A2-P  | CTCACTCCCATCACGCCGTCCAGC       |
| Hs_SLC20A2-F  | GGAGAAGAGTGATCCAGACCATG        |
| Hs_SLC20A2-R  | CACCACTGTGAAGGCTGAGG           |
| Hs_SLC17A1-P  | ACAGAACGAACCAGAGAAGACATACGGCAC |
| Hs_SLC17A1-F  | GGTCTTCTATATTTTTGGTGCTTGTG     |
| Hs_SLC17A1-R  | GGGTGGTCTTTGGGGTCATC           |
| Hs_SLC34A1-P  | CCTCAGGGACTCATCACCAGTGGCAATG   |
| Hs_SLC34A1-F  | GTCATCATCCAGCTGGACG            |
| Hs_SLC34A1-R  | CTGTAAGGAGTCTGGGTGGC           |
| Hs_SLC34A2-P  | ACAAGGAGAACATCGCCAAATGCCAGC    |
| Hs_SLC34A2-F  | ACTGGACCATGAAGAATGTGACC        |
| Hs_SLC34A2-R  | CAGCAAGATCCGGGAGGTG            |
| Hs_SLC34A3-P  | CACAGGCAACGCCACTAACAGCAGTCTC   |
| Hs_SLC34A3-F  | CGTGCAGTTGGACTCCGA             |

|                |                                                                                                                                       |
|----------------|---------------------------------------------------------------------------------------------------------------------------------------|
| Hs_SLC34A3-R   | TGTTCTCCTGGGTCGGCTG                                                                                                                   |
| Hs_XPR1-P      | AGAAGGCTCAGGCACCACAATATCCCGA                                                                                                          |
| Hs_XPR1-F      | GTCTCATCAACATCTCTTTGAGATTG                                                                                                            |
| Hs_XPR1-R      | TGTGGGGATGACACTAATTGGAG                                                                                                               |
| Hs_SLC20A1-std | CTTCCCAGCGTGGACTTGAAAGAGGAAACCAGCATAGA<br>TAGCACCGTGAATGGTGCAGTGCAGTTGCCTAATGGGA<br>ACCTTGTCCAGTTCAGTCAAGCCGTCAGCAA                   |
| Hs_SLC20A2-std | CTGGGGGAGAAGAGTGATCCAGACCATGGGGAAGGAC<br>CTCACTCCCATCACGCCGTCCAGCGGCTTCACGATCGA<br>GCTGGCCTCAGCCTTCACAGTGGTGATCGC                     |
| Hs_SLC17A1-std | CCCATGGTCTTCTATATTTTTGGTGCTTGTGGCTGTGCC<br>GTATGTCTTCTCTGGTTCGTTCTGTTTTATGATGACCCC<br>AAAGACCACCCATGTA                                |
| Hs_SLC34A1-std | ACGAAGCTCATCATCCAGCTGGACGAGTCTGTGATAAC<br>CAGCATTGCCACTGGTGATGAGTCCCTGAGGAACCACA<br>GTCTCATCCAGATCTGGTGCCACCCAGACTCCTTACAG<br>CAAAA   |
| Hs_SLC34A2-std | CCAAAACCTGGACCATGAAGAATGTGACCTACAAGGAG<br>AACATCGCCAAATGCCAGCATATCTTTGTGAATTTCCA<br>CCTCCCGGATCTTGCTGTGGGC                            |
| Hs_SLC34A3-std | CTCATCGTGCAGTTGGACTCCGACATGATCATGAGCAG<br>TGCCACAGGCAACGCCACTAACAGCAGTCTCATTAAAGC<br>ACTGGTGCGGCACCACGGGGCAGCCGACCCAGGAGAA<br>CAGCAGC |
| Hs_XPR1-std    | AATTTGTCTCATCAACATCTCTTTGAGATTGCTGGATTC<br>CTCGGGATATTGTGGTGCCTGAGCCTTCTGGCATGCTTC<br>TTTGCTCCAATTAGTGTGCATCCCCACATATGT               |

**Supplementary Table 9. Sequences of oligonucleotide primers used in qPCR with SYBR Green (Results are shown in Supplementary Fig. 6).**

| Primer Name | Sequences (5'→3')    |
|-------------|----------------------|
| XPR1-F      | ATCTCGTGGAGCAGATTGGC |
| XPR1-R      | GGGGACACGTAAACGCTTCA |
| GAPDH-F     | CACTAGGCGCTCACTGTTCT |
| GAPDH-R     | GACCAAATCCGTTGACTCCG |

## Supplementary Methods

### Characterisation of SC-919

SC-919, a single isomer, was prepared via stereoselectivity according to our developed method <sup>1</sup>. The absolute configuration of SC-919 was determined using X-ray crystallography; CCDC (Deposition Number) 2075338.

### Kinase selectivity assay (kinome-wide selectivity profile of SC-919)

The kinome-wide selectivity profile of SC-919 was analysed using the KINOMEscan technology provided by DiscoverRx <sup>2</sup>. For most of the assays, kinase-tagged T7 phage strains were grown in parallel in 24-well blocks in an *E. coli* host derived from the BL21 strain. *E. coli* cells were grown until the log phase and infected with T7 phage from a frozen stock (multiplicity of infection = 0.4) and incubated with shaking at 32 °C until lysis occurred (90–150 min). The lysates were centrifuged (6,000 × *g*) and filtered (0.2 μm) to remove the cell debris. The remaining kinases were expressed in HEK293 cells and subsequently tagged with DNA for qPCR detection. Streptavidin-coated magnetic beads were treated with biotinylated small molecule ligands for 30 min at 22–26 °C to generate affinity resins for kinase assays. The liganded beads were blocked with excess biotin and washed with blocking buffer (SeaBlock [Pierce], 1 % BSA, 0.05 % Tween 20, 1 mM DTT) to remove the unbound ligand and to reduce the non-specific binding of phages. The binding reactions were assembled by mixing the kinases, liganded affinity beads, and test compounds in 1× binding buffer (20 % SeaBlock, 0.17× PBS, 0.05 % Tween 20, 6 mM DTT). Test compounds were prepared as 40× stocks in 100 % DMSO and were directly diluted into the assay mixture. All the reactions were performed in 384-well polypropylene plates at a final volume of 0.02 mL. The assay plates were incubated at 22–26 °C with shaking for 1 h, and the affinity beads were washed with wash buffer (1× PBS, 0.05 % Tween 20). The beads were resuspended in elution buffer (1x PBS, 0.05 % Tween 20, 0.5 μM non-biotinylated affinity ligand) and incubated at 22–26 °C with shaking for 30 min. The concentrations of kinases in the eluates were measured using qPCR. Detailed information is available at the Eurofin DiscoverRx website (<https://www.discoverx.com/>).

### Qualification for the measurement of InsP<sub>6</sub> and InsP<sub>7</sub>

#### Preparation of SC-919-treated sample for quality control (QC) sample

Cells (293, HAP1 wild-type) were treated with the 1 μM of SC-919 for 4 h, and were then immediately treated with trypsin and 10 % FCS-supplemented medium containing similar concentrations of SC-919. The cells were collected and centrifuged (2,000 × *g*, 1 min) and the supernatant was removed. The animals were used for *in vivo* experiments when they were 10 weeks old (Sprague-Dawley (SD) rats). SC-919 (10 mg/kg) was administered, and after 6 h, the rats were anaesthetised with isoflurane (1–5 % v/v) and sacrificed by exsanguination to collect tissue samples. The cell and tissue samples were placed at –80 °C until required for analysis. The frozen tissue or cell samples were mixed with 3.6 % perchloric acid (v/v, prepared in distilled water [Nippon Gene]) (prepared using 0.2 and 0.3 mL of 3.6 % PCA per cell sample [ $1 \times 10^6$  and  $4 \times 10^6$  cells for 293 and HAP1 wild-type cells, respectively] and 100 mg tissue samples). The samples incubated on ice were subsequently immediately homogenised for 2.5–10 min with zirconia beads (5 mm) using a mechanical homogeniser (1,100 rpm; Shakemaster, Bio Medical Science, Japan) followed by a spin-down. Subsequently, one-third (v/v, against PCA) of 30 % (w/v) potassium chloride solution was mixed with the homogenised samples with vortexing.

Next, samples were centrifuged ( $20,000 \times g$ , 5 min,  $4^{\circ}\text{C}$ ) and were used for subsequent analyses in InsP<sub>6</sub> and InsP<sub>7</sub> measurements.

### **Method qualification for the determination of InsP<sub>6</sub> and InsP<sub>7</sub> levels in tissues and cells using LC/MS/MS**

LC/MS/MS conditions for determination of InsP<sub>6</sub> [099107, Matrix Scientific] and InsP<sub>7</sub> are shown in the main text. Stock solutions were prepared by dissolving accurately weighted InsP<sub>6</sub> or InsP<sub>7</sub> in water to yield a concentration of 10 mg/mL for InsP<sub>6</sub>, 1 mg/mL for InsP<sub>7</sub>. These stock solutions were further diluted in water to prepare working solutions for calibration curve, quality control (QC) samples and dilution integrity QC (DIQC) samples. The concentrations of working solutions ranged from 600 ng/mL to 600,000 ng/mL for InsP<sub>6</sub>, 3 ng/mL to 30,000 ng/mL for InsP<sub>7</sub>. Rat blank plasma was mixed with 3.6 % perchloric acid (v/v, prepared in distilled water) (prepared using 0.3 mL of 3.6 % PCA per 0.1 mL rat blank plasma). Subsequently, one-third (v/v, against PCA) of 30 % (w/v) potassium chloride solution was mixed with the mixed rat blank plasma with vortexing. Next, the mixtures were centrifuged ( $20,000 \times g$ , 5 min,  $4^{\circ}\text{C}$ ). The supernatant (PCA/potassium chloride-treated plasma) was used as blank matrix for preparation of calibration standard, and rat blank plasma was used as a surrogate matrix for tissues and Cells. Calibration standards for InsP<sub>6</sub> or InsP<sub>7</sub> were prepared by adding 10  $\mu\text{L}$  of working solution to 150  $\mu\text{L}$  of PCA/potassium chloride-treated plasma. QC samples in SC-919-treated sample for InsP<sub>6</sub> or InsP<sub>7</sub> were prepared by adding 10  $\mu\text{L}$  of working solution to 150  $\mu\text{L}$  of prepared SC-919-treated cell or tissue samples (see the section of “Preparation of SC-919-treated sample for quality control (QC) sample”) at low (LQC), medium (MQC) and high (HQC) levels. Dilution integrity QC samples (DIQC) for InsP<sub>7</sub> in kidney were prepared by adding 8  $\mu\text{L}$  of working solution at 30,000 ng/mL to 592  $\mu\text{L}$  of prepared SC-919-treated kidney samples (see section “Preparation of SC-919-treated sample for quality control (QC) sample”) at 400 ng/mL. After mixing, the mixtures were diluted with PCA/potassium chloride-treated plasma to 40 ng/mL (diluted DIQC sample). These calibration standards, QC and diluted DIQC samples were spiked with internal standard solution (20  $\mu\text{L}$ , 500 ng/mL InsP<sub>6</sub>-*d*<sub>6</sub> as an internal standard, 2,500 ng/mL *N, N, N', N'* – ethylenediaminetetrakis (methylenephosphonic acid) [E0393, Tokyo Chemical Industry]). After mixing, the mixtures were centrifuged ( $20,000 \times g$ , 5 min,  $4^{\circ}\text{C}$ ), and the supernatant was subjected to ultrafiltration ( $15,000 \times g$ , 30 min,  $4^{\circ}\text{C}$ ; Amicon Ultra-0.5 Centrifugal Filter Unit, 3 kDa Molecular Weight Cutoff [UFC5003, Merck KGaA]). The filtrates (96  $\mu\text{L}$ ) were mixed with 40  $\mu\text{L}$  of water/hexylamine [H0134, Tokyo Chemical Industry]/acetic acid [01021-00, Kanto Chemical] (volume ratio, 44:3:3, respectively), then subjected to LC-MS/MS. Injection volume for determination of InsP<sub>6</sub> and InsP<sub>7</sub> was 2  $\mu\text{L}$  and 25  $\mu\text{L}$ , respectively.

The accuracy and precision for InsP<sub>6</sub> and InsP<sub>7</sub> were evaluated by analysing triplicates of QC samples. The results are shown in Supplementary Table 2 (calibration curve), Supplementary Table 3 and Supplementary Table 4 (accuracy and precision), and Supplementary Fig. 3 and Supplementary Fig. 4 (representative chromatogram of LQC).

### **Method for Supplementary Fig. 6**

#### **Preparation of protein samples for western blot analysis**

Wild-type and *XPR1* KO HAP1 cells were cultured (200,000 cells/well) in 12-well culture plates with IMDM containing 10 % FCS. As an *XPR1*-positive control, the human *XPR1*-expressing vector was introduced into *XPR1* KO cells using the Xfect reagent following the procedure



described in the Methods section. The culture medium was replaced the next day, and the cells were cultured for one more day. The culture medium was then removed, and the cells were treated with M-PER™ Mammalian Protein Extraction Reagent (500 µL) containing the protease inhibitor cocktail (cOmplete™ ULTRA) by shaking the plate for 10 min at 22–26 °C. Samples were collected and centrifuged (12,000 × g, 1 min, 4 °C). The supernatant (250 µL) was mixed with 4× Laemmli Sample Buffer (250 µL, Bio-Rad) and 10 M urea solution (500 µL, final 5 M) in 2-mL tubes. The samples were properly mixed for 8 h at 22–26 °C using a rotator and used for western blot analysis. We used 10 (HAP1 wild-type and *XPR1* KO cells) and 2 µL (*XPR1*-overexpressed *XPR1* KO cells) samples for loading.

### **Antibodies**

The antibodies used for western blot analysis were as follows: XPR1 (1:1,000, HPA016557, Atlas Antibodies), HRP-conjugated beta-actin (1:2,000, PM053-7, MEDICAL & BIOLOGICAL LABORATORIES CO., LTD.), and Peroxidase-AffiniPure Goat anti-Rabbit IgG (H+L) (1:10,000, 111-035-144, Jackson ImmunoResearch).

### **SDS-PAGE and immunoblotting**

The proteins were separated using SDS/PAGE (TGX gel, Bio-Rad) and transferred onto a PVDF membrane (Bio-Rad). The membrane was blocked in 5 % BSA and incubated for 18 h with the primary antibodies and subsequently with the respective secondary antibodies. Thereafter, the blot was developed using the ECL reagent (GE Healthcare) and immunoreactive signals were detected using the LAS-3000 imaging system (FUJIFILM Wako).

### **Preparation of total RNA and cDNA**

Tissue samples were dissected and immediately frozen on dry ice. The tissue or cell samples were homogenised in QIAzol Lysis Reagent (QIAGEN), and total RNA was isolated using RNeasy kit purification (QIAGEN). First-strand cDNA synthesised was performed using the ReverTra Ace® qPCR RT Master Mix (Toyobo).

### **Measurement of mRNA levels**

To determine the relative mRNA expression levels, a quantitative polymerase chain reaction was performed using the TaqMan gene expression assay (*Nphs2*, Rn00709834\_m1; *Cyp27b1*, Rn01647147\_g1; Rn28s as an internal control, Rn03034784\_g1). The expression level relative to that in the vehicle-treated group was calculated using the comparative CT ( $2^{-\Delta\Delta CT}$ ) method (User Bulletin #2, Applied Biosystems). For the comparative CT method, the  $\Delta CT$  value was determined by subtracting the average of the CT value for the internal control from the average of the CT value for the target. The absolute copy number of the target gene was determined using a standard curve generated by amplifying known concentrations of synthetic oligonucleotides. The oligonucleotide primers, dual-labelled (FAM-TAMRA) oligonucleotide probes, and standard oligonucleotides were synthesised by Sigma-Aldrich (Supplementary Table 8 and Supplementary Table 9). Amplification was performed on an ABI PRISM 7900HT Sequence Detector (Thermo Fisher Scientific) using the EXPRESS qPCR Supermix (Thermo Fisher Scientific) or THUNDERBIRD® qPCR Mix (Toyobo) as recommended by the manufacturers.

### **Treatment of cells with test compounds and determination of cellular protein levels**

Cultured cells (293, HAP1 wild-type, HAP1 *XPR1* KO) were treated with the indicated concentration of the compound for 4 h. The protein was extracted from the cells using the M-PER protein extraction reagent, and protein levels were determined using the Pierce® 660 nm protein assay (Thermo Fisher Scientific).

#### **Supplementary References**

1. Terao, Y., *et al.* WO2018182051 IP6K INHIBITORS. (2018).
2. Fabian, M.A., *et al.* A small molecule-kinase interaction map for clinical kinase inhibitors. *Nat Biotechnol* **23**, 329-336 (2005).
